# Supplementary material for: Highly efficient CO2 capture and chemical fixation of a microporous (3, 36)-connected txt-type Cu(ii)-MOF with multifunctional sites
Source: Royal Society of Chemistry journal article supplement (doi:10.1039/d4dt01531b), 2024-11-15
Supplement: d4dt01531b1.pdf [file d4dt01531b1.pdf]

## Electronic Supporting Information

# Highly efficient CO<sub>2</sub> capture and chemical fixation of a microporous (3, 36)-connected *txt*-type Cu(II)-MOF with multifunctional sites

Wenyu Dong <sup>a</sup>, Zhaoxu Wang<sup>\*a</sup>, Zuxian Cai <sup>a</sup>, Yiqiang Deng<sup>\*b</sup>, Guanyu Wang <sup>a</sup>  
and Baishu Zheng<sup>\*a</sup>

<sup>a</sup>Key Laboratory of Theoretical Organic Chemistry and Function Molecule of Ministry of Education, Hunan Provincial Key Laboratory of Controllable Preparation and Functional Application of Fine Polymers, Hunan Provincial Key Laboratory of Advanced Materials for New Energy Storage and Conversion, School of Chemistry and Chemical Engineering, Hunan University of Science and Technology, Xiangtan 411201, China. E-mail: zbaishu@163.com (B. S. Zheng); hunst\_chem@163.com (Z. X. Wang).

<sup>b</sup> School of Chemical Engineering, Guangdong University of Petrochemical Technology, Maoming 525000, Guangdong, China. E-mail: yqdeng@gdupt.edu.cn (Y. Q. Deng).

## 1. Materials and Methods

All chemical reagents were obtained from commercial sources and used without further purification unless otherwise noted.  $^1\text{H}$  NMR spectra were recorded on a Bruker AVANCE III 500 MHz spectrometer with tetramethylsilane as an internal reference. The IR spectra were recorded in the 400-4000  $\text{cm}^{-1}$  on a VECTOR TM 22 spectrometer using KBr pellets. Thermal gravimetric analysis (TGA) were performed under  $\text{N}_2$  atmosphere ( $100 \text{ mL min}^{-1}$ ) with a heating rate of  $5 \text{ K min}^{-1}$  using a 2960 SDT thermogravimetric analyzer. Crystallographic data of the HNUST-17 were collected by an Apex II diffractometer with  $\text{Mo}/\text{K}\alpha$  radiation ( $\lambda = 0.71073 \text{ \AA}$ ) at room temperature. Powder X-ray diffraction (PXRD) data were collected on a Bruker D8 ADVANCE X-ray diffractometer using  $\text{Cu } \text{K}\alpha$  radiation ( $\lambda = 1.5418 \text{ \AA}$ ) at room temperature. Low-pressure gas adsorption-desorption isotherms were obtained using a Belsorp-mini volumetric adsorption instrument from BEL Japan Inc. High-pressure gravimetric gas adsorption-desorption measurements were performed on an BELSORP-HP adsorption analyzer (Janpan).

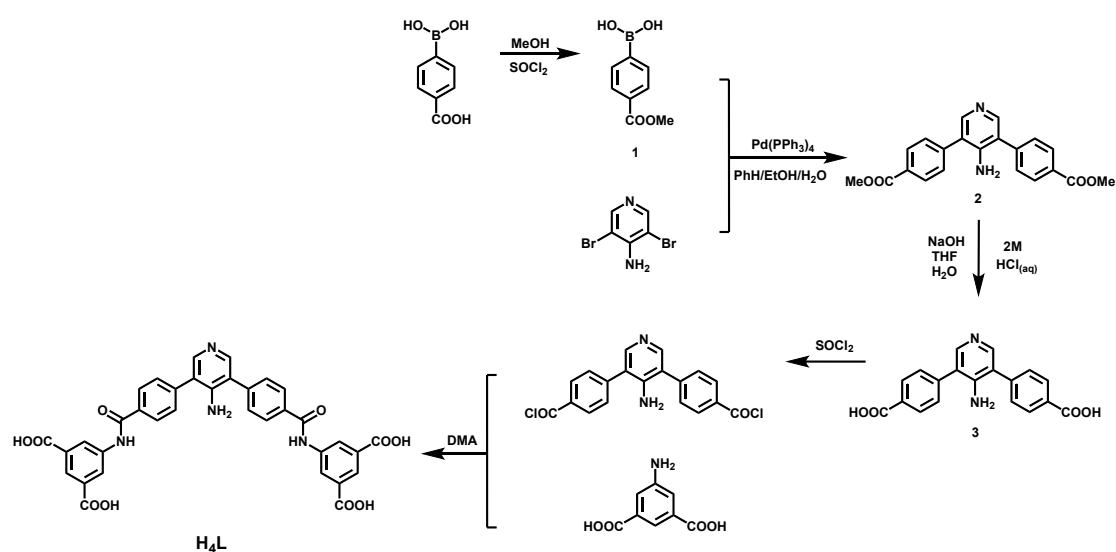

**Scheme S1.** Synthetic route of the organic linker, 5,5'-((4,4'-(4-aminopyridine-3,5-diyl)bis(benzoyl)bis(azanediyl))diisophthalic acid,  $\text{H}_4\text{L}$

### 2. Synthesis of 4-(methoxycarbonyl)phenylboronic acid (1)

$\text{SOCl}_2$  (10 mL, 138 mmol) was added dropwise to a solution of 4-carboxyphenyl boric acid (1.0 g, 6.02 mmol) in 10 mL methanol, and then the solution was refluxed at  $75 \text{ }^\circ\text{C}$  with rigorous stirring for 24 hours. After removal of excess methanol and  $\text{SOCl}_2$  under vacuum, the residue was washed by water repeatedly, dried at  $100 \text{ }^\circ\text{C}$  to give the 4-(methoxycarbonyl)phenylboronic acid as a white solid (0.951 g, ~95.1% yield).  $^1\text{H}$  NMR (500 MHz,  $\text{DMSO}-d_6$ ,  $\delta$  ppm): 8.06 (s, 2H, ArH), 7.80 (s, 2H, ArH), 4.12 (s, 2H, OH), 3.89 (s, 3H,  $\text{CH}_3$ ).

### 3. Synthesis of dimethyl 4,4'-(4-aminopyridine-3,5-diyl)dibenzoate (2)

The mixture of 3,5-dibromopyridine-4 amine (1.26 g, 5.00 mmol),  $\text{Pd}(\text{PPh}_3)_4$  (0.29 g, 0.25 mmol), 4-(methoxycarbonyl)phenylboronic acid (2.16 g, 12 mmol),  $\text{K}_2\text{CO}_3$  (3.32 g, 7.2 mmol) and toluene-ethanol-water (30 mL, 15 mL, 15 mL) was stirred at  $75 \text{ }^\circ\text{C}$  for 24 hours and then cooled to room temperature. After removal of organic solvent under vacuum, the residue was dissolved in 150 mL  $\text{H}_2\text{O}$  and then extracted three times by dichloromethane (100 mL). After removal of dichloromethane

under vacuum, the residue was washed with methanol several times to give dimethyl 4,4'-(4-aminopyridine-3,5-diyl)dibenzoate as a white solid (0.666 g, ~yield 45.95%). <sup>1</sup>H NMR (500 MHz, DMSO-*d*<sub>6</sub>, δ ppm): 8.23 (s, 2H, ArH), 8.04 (s, 4H, ArH), 7.68 (s, 4H, ArH), 7.15 (s, 2H, NH<sub>2</sub>), 3.86 (s, 6H, CH<sub>3</sub>).

#### 4. Synthesis of 4,4'-(4-aminopyridine-3,5-diyl)dibenzoic acid (3)

80 mL (2M) of sodium hydroxide aqueous solution was added to a solution of dimethyl 4,4'-(4-aminopyridine-3,5)-benzoate (1.45 g, 4.00 mmol) in 60 mL DMF, and the solution was stirred at 60 °C for 6 hours. After removal of DMF under vacuum, the residue was dissolved in water, acidified with 12 M HCl to pH = 2~3. The precipitated solids were filtered off and repeatedly washed with water and then dried in a vacuum oven at 100 °C to give pure 4,4'-(4-aminopyridine-3,5-diyl)dibenzoic acid as a light yellow solid (0.775 g, ~yield 62.5%). <sup>1</sup>H NMR (500 MHz, DMSO-*d*<sub>6</sub>, δ ppm): 13.14 (broad peak, 2H, COOH), 8.22 (s, 2H, ArH), 8.09 (s, 4H, ArH), 7.65 (s, 4H, ArH), 7.16 (s, 2H, NH<sub>2</sub>).

#### 5. Activation of HNUST-17

The solvent-exchanged HNUST-17 was prepared by immersing the as-synthesized sample in dry acetone for 48 hours to remove the non-volatile solvates (DMF and water), the extract was decanted every 8 hours and fresh acetone was replaced. The completely activated HNUST-17 sample was obtained by heating the acetone-exchanged sample at 110 °C under a dynamic high vacuum for 24 hours. During this time, the pale blue sample changed to a deep purple-blue colour (Fig. S3), indicative of the presence of open copper(II) sites. The completely-activated samples were moisture sensitive and a few minutes of exposure to air could change the sample's color back to pale blue. Selected IR (KBr, cm<sup>-1</sup>, Fig. S4): 3555, 3411, 3233, 2031, 1621, 1552, 1369, 1290, 1107, 1014, 887, 856, 782, 724, 617, 475.

#### 6. IAST selectivity calculation

Ideal adsorbed solution theory (IAST)<sup>[S1]</sup> was used to predict binary mixture adsorption from the experimental pure-gas isotherms. To perform the integrations required by IAST, the experimental single-component isotherms was fitted by the dual-site Langmuir-Freundlich equation:

$$N = a_1 \cdot \frac{b_1 \cdot P^{1/c_1}}{1 + b_1 \cdot P^{1/c_1}} + a_2 \cdot \frac{b_2 \cdot P^{1/c_2}}{1 + b_2 \cdot P^{1/c_2}} \quad (1)$$

Here, *P* is the pressure of the bulk gas at equilibrium with the adsorbed phase (kPa), *N* is the adsorbed amount per mass of adsorbent (mol/kg), *a*<sub>1</sub> and *a*<sub>2</sub> are the saturation capacities of sites 1 and 2 (mol/kg), *b*<sub>1</sub> and *b*<sub>2</sub> are the affinity coefficients of sites 1 and 2 (1/kPa), and *c*<sub>1</sub> and *c*<sub>2</sub> represent the deviations from an ideal homogeneous surface.

For a binary mixture of species *i* and *j*, the adsorption selectivity, *S*<sub>ads</sub>, is defined as:

$$S_{ads} = \frac{x_i/x_j}{y_i/y_j} \quad (2)$$

Here,  $S_{ads}$  is the adsorption selectivity.  $x_i$  and  $x_j$  are the mole fractions of components  $i$  and  $j$  in the adsorbed phase, respectively. While  $y_i$  and  $y_j$  are the mole fractions of components  $i$  and  $j$  in the gas phase, respectively.

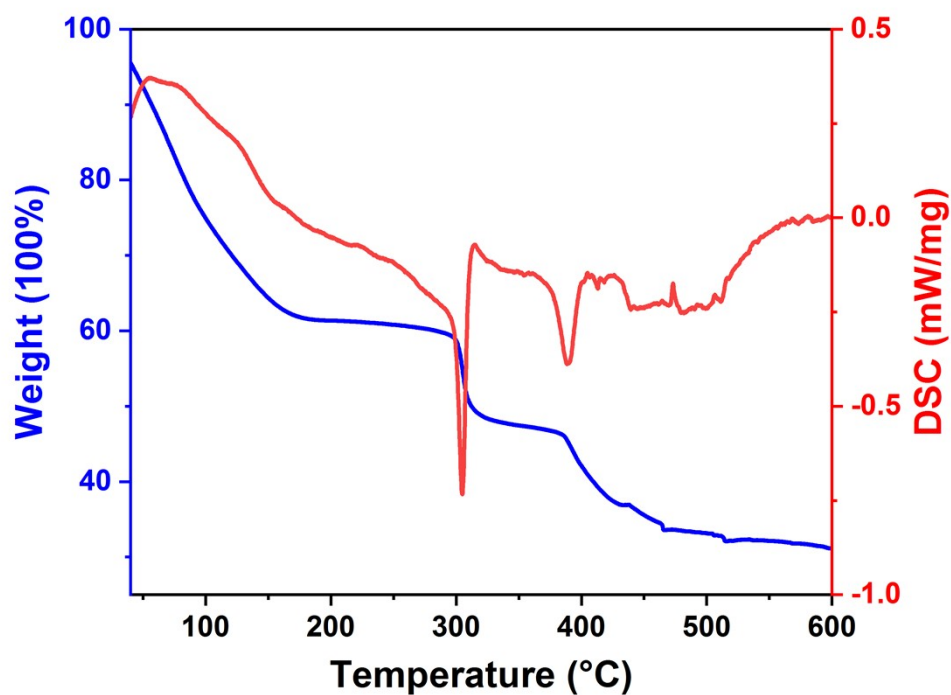

Fig. S1 TGA-DSC data of as-synthesized HNUST-17.

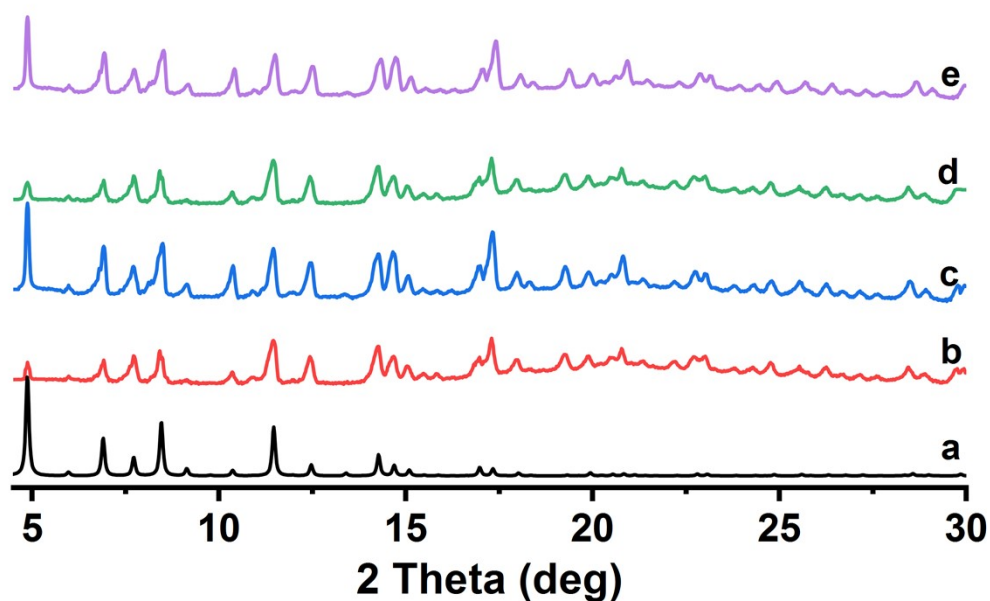

Fig. S2 PXRD patterns of HNUST-17: a) simulated, b) as-synthesized, c) activated, d) immersion in water for 2 days, and e) after the 5<sup>th</sup> cycle of catalytic reaction, respectively.

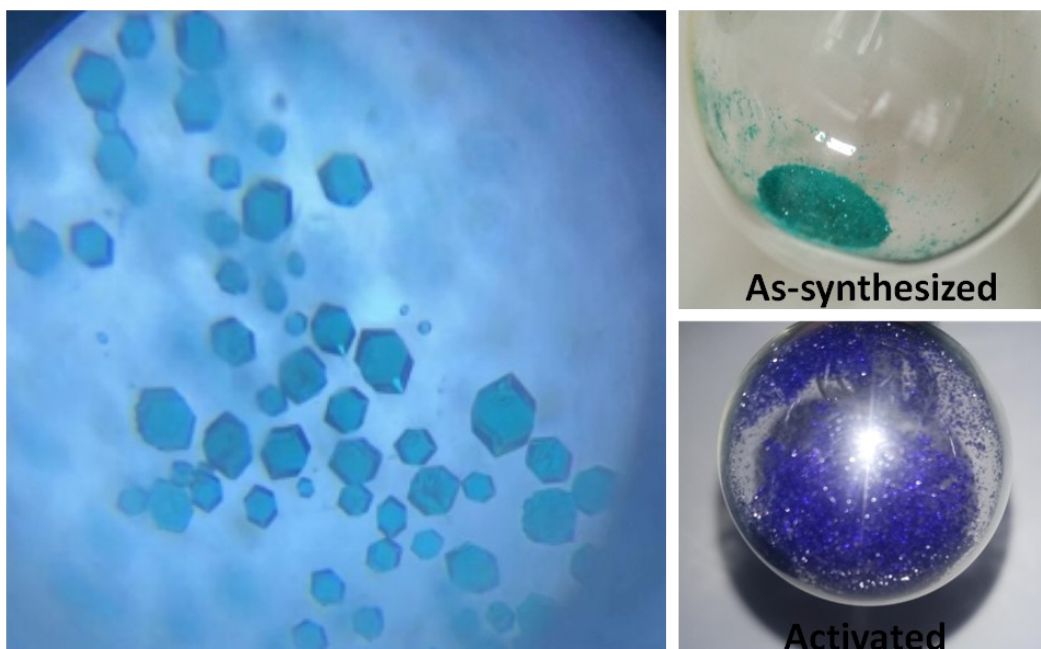

**Fig. S3** Left) Photographic image of as-synthesized HNUST-17, the crystal size has been magnified about 80 times; Right) Visual color change of HNUST-17 upon activation.

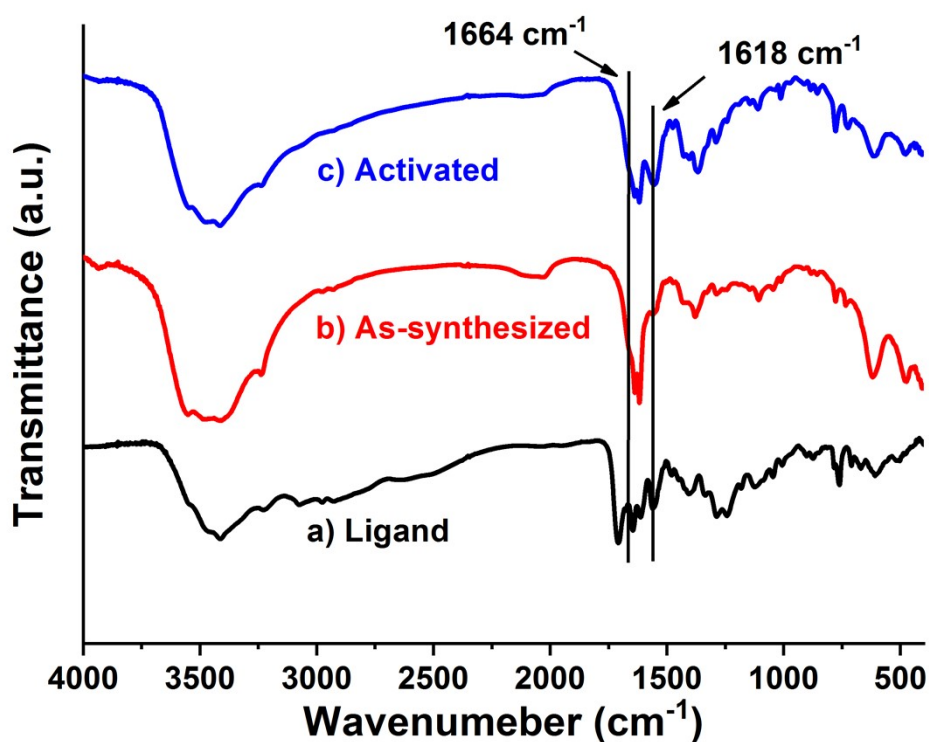

**Fig. S4** The IR spectra for HNUST-17. a) Ligand; b) As-synthesized; and c) Activated HNUST-17. Note the absence of the vibration frequencies of the solvent DMF and methanol molecules in the activated samples. The presence of the  $\nu(\text{OH})$  stretching frequencies at  $1618\text{ cm}^{-1}$  in activated samples may result from the rapid re-adsorption of trace moisture during the IR measurements.

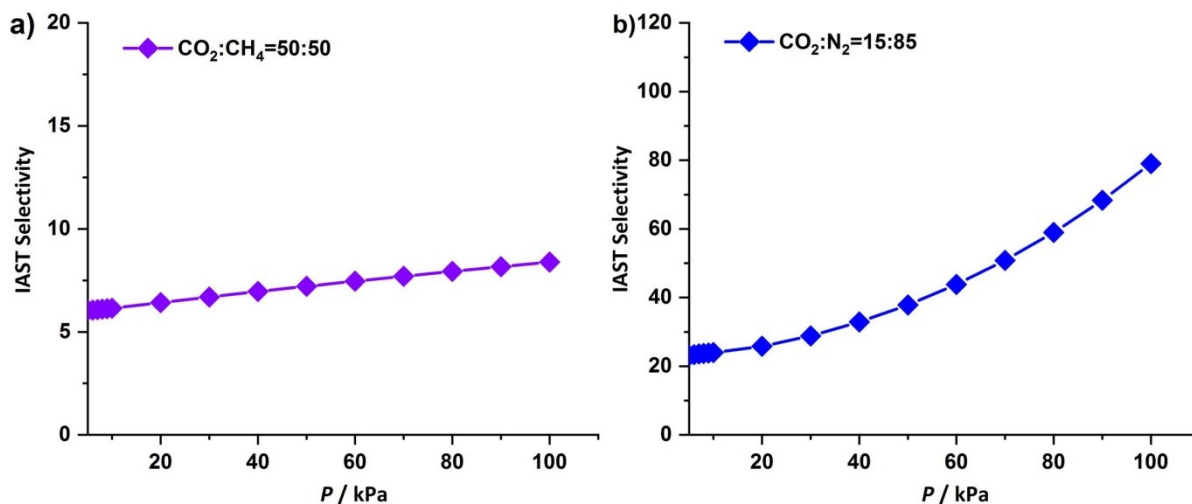

**Fig. S5** IAST (Ideal Adsorbed Solution Theory) selectivity of  $\text{CO}_2/\text{CH}_4$  and  $\text{CO}_2/\text{N}_2$  for HNUST-17 at 273 K under 1 bar. HNUST-17 shows a moderate  $\text{CO}_2/\text{CH}_4$  selectivity of 8.4 for  $\text{CO}_2$ - $\text{CH}_4$  (50:50) binary mixtures, and high  $\text{CO}_2/\text{N}_2$  selectivity with value of 79 for  $\text{CO}_2$ - $\text{N}_2$  (15:85) binary mixtures at 273 K and 1 bar, respectively.

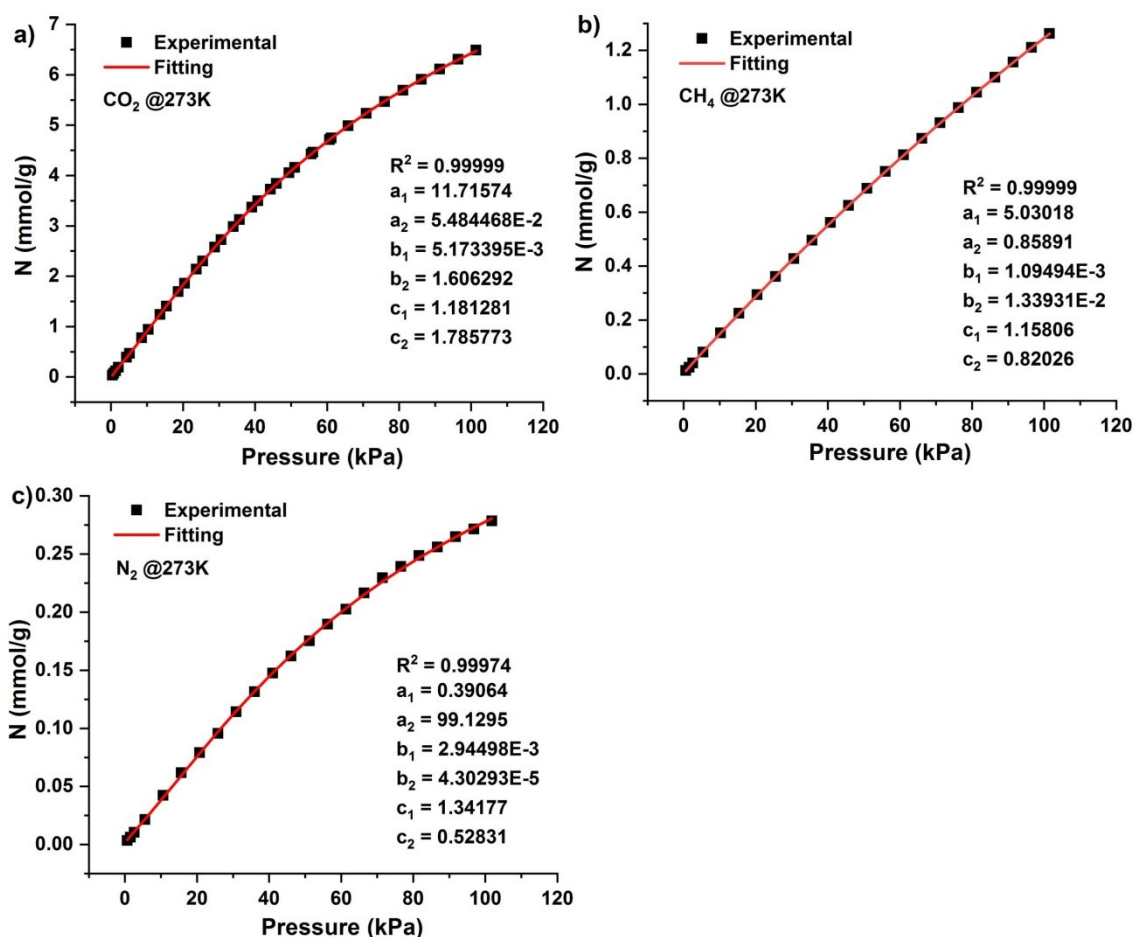

**Fig. S6** a-c) Details of dual-site Langmuir-Freundlich equation (solid lines) fitting to the experimental  $\text{CO}_2$ ,  $\text{CH}_4$  and  $\text{N}_2$  adsorption data (symbols) for HNUST-17 collected at 273 K, respectively. Note: The  $R^2$  values for all the fitted isotherms were over 0.99974. Hence, the fitted isotherm parameters were applied to perform the integrations in IAST.

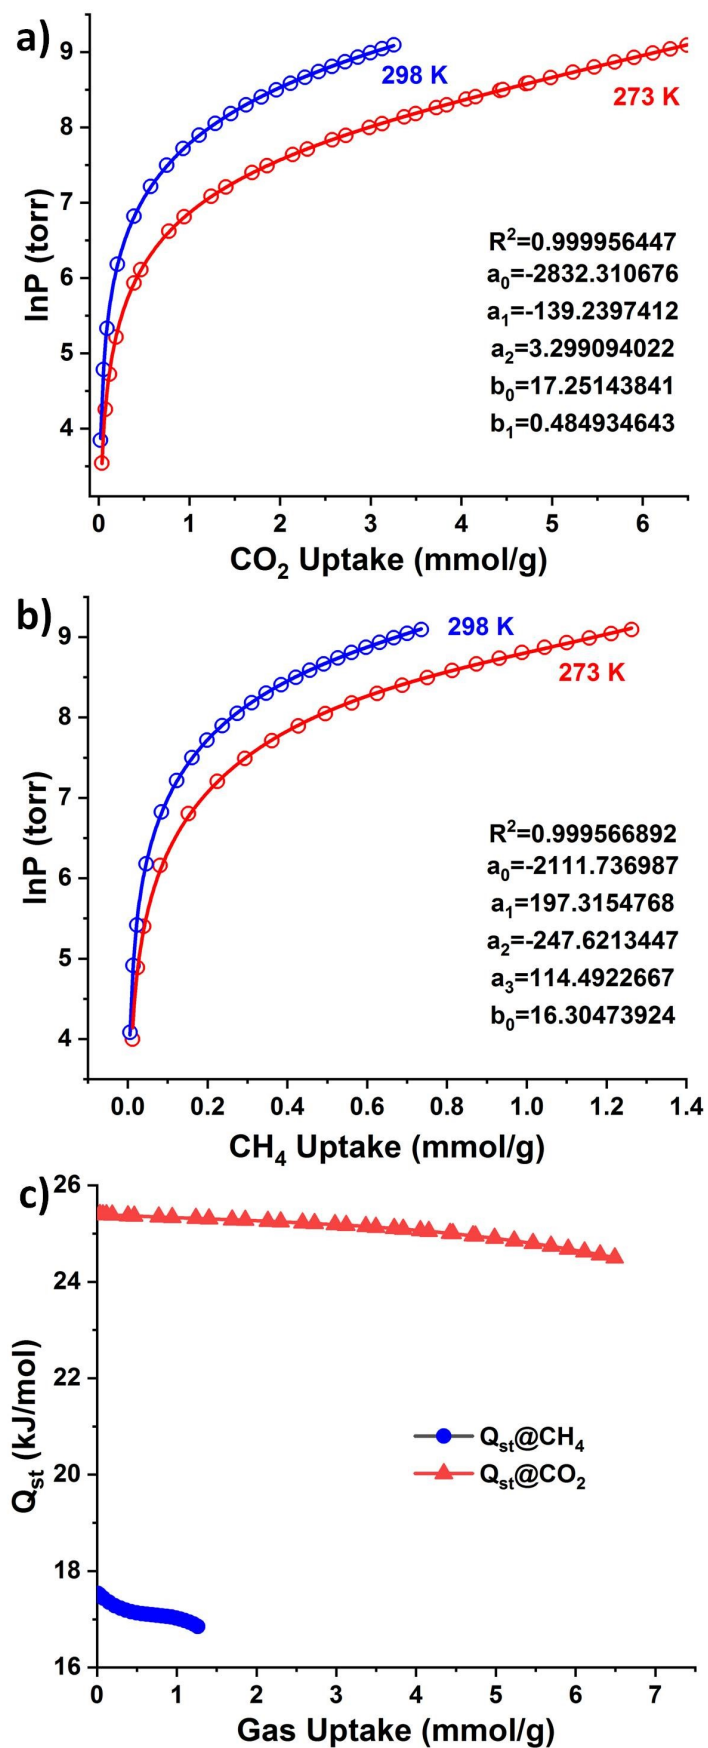

**Fig. S7** a-b) Details of Virial equation (symbols) fitting to the experimental  $\text{CO}_2$  and  $\text{CH}_4$  adsorption data (solid lines) for HNUST-17 collected at 273 K and 298 K; c) The  $\text{CO}_2$  and  $\text{CH}_4$  isosteric adsorption enthalpies of HNUST-17.



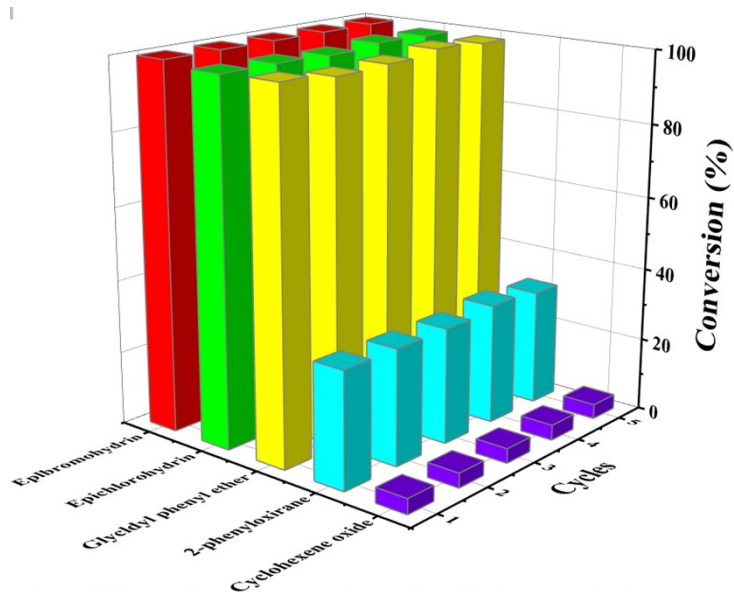

**Fig. S8** Recycle experiments of HNUST-17 for the cycloaddition of CO<sub>2</sub> with various epoxides at 80 °C and 1 bar pressure of CO<sub>2</sub>.

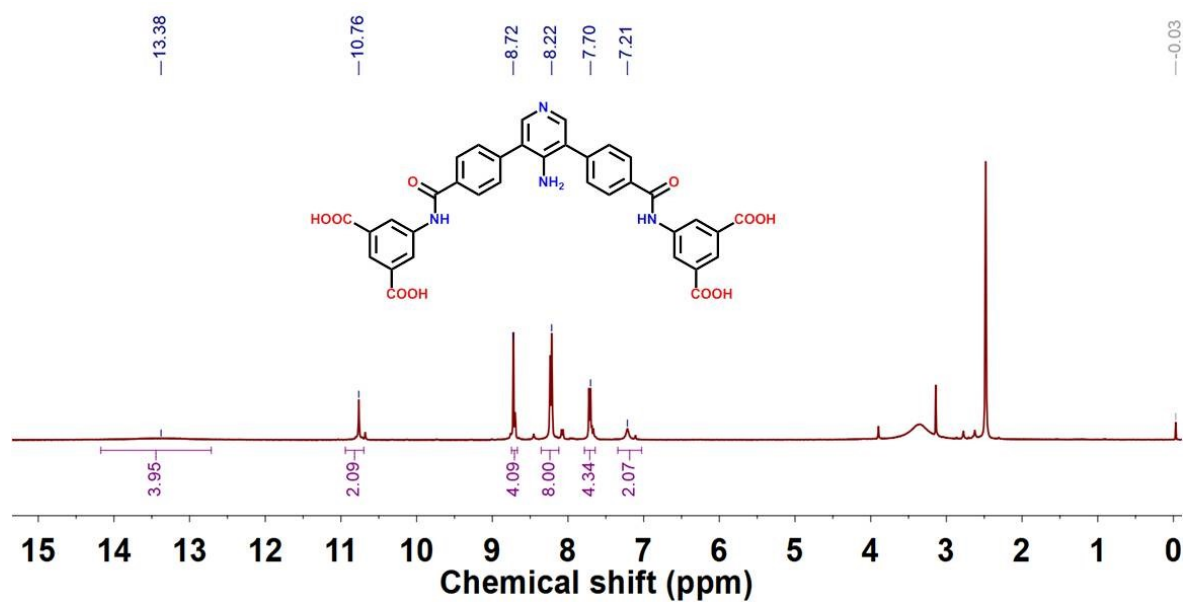

**Fig. S9** The <sup>1</sup>H NMR spectrum of the organic linker, 5,5'-((4,4'-(4-aminopyridine-3,5-diyl)bis(benzoyl))bis(azanediyl))diisophthalic acid, H<sub>4</sub>L.

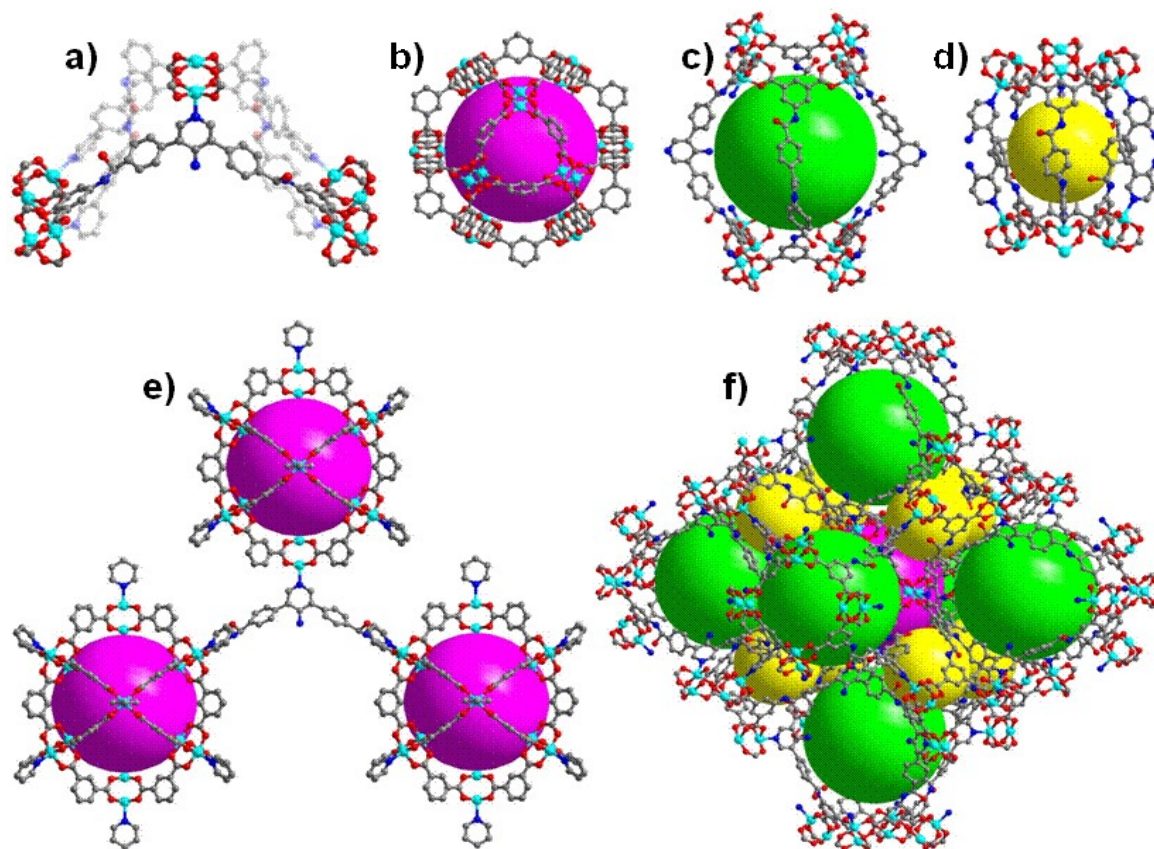

**Fig. S10** Crystal structure of HNUST-17. a) Coordination environment of the dicopper(II) paddlewheel clusters and ligands. b-d) Cage A (cuboctahedron) and Cages B-C in the framework. e-f) Schematic (3, 36)-connected txt topological structure. Cu, blue-green; C, black; O, red; N, blue. Water molecules and H atoms have been omitted for clarity.

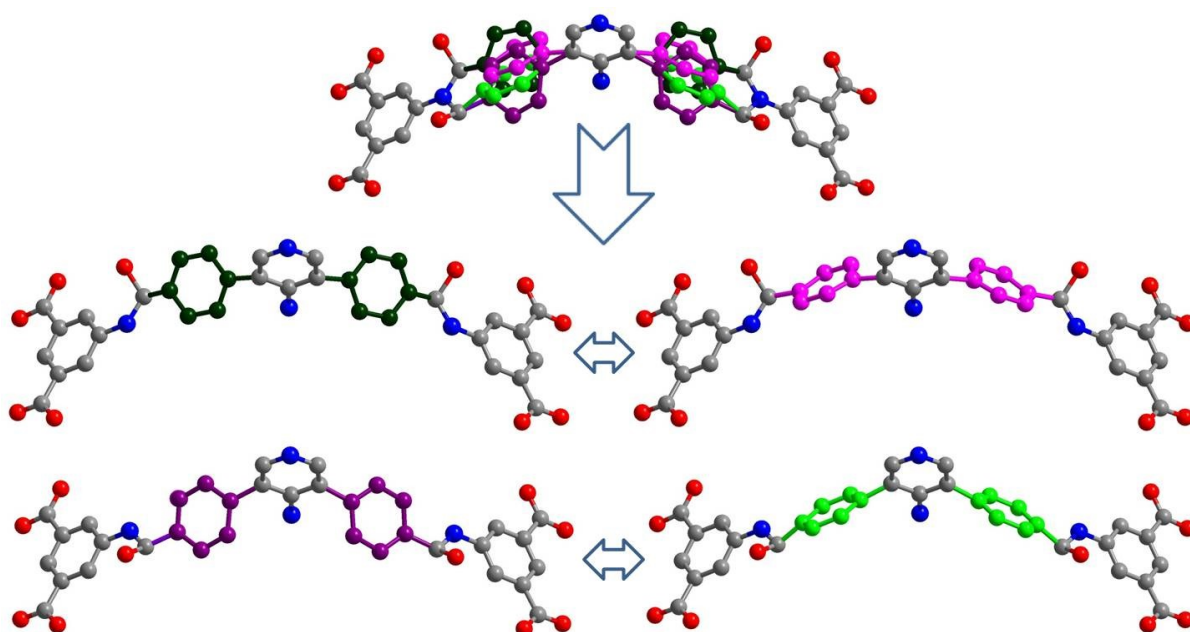

**Fig. S11** The acylamide and benzene moieties of the H<sub>4</sub>L linker in the crystal structure of HNUST-17 are disordered over two and four positions with equal probability, respectively. Only the *cis*-structures of the amide moieties in ligand are showed in above illustrations.

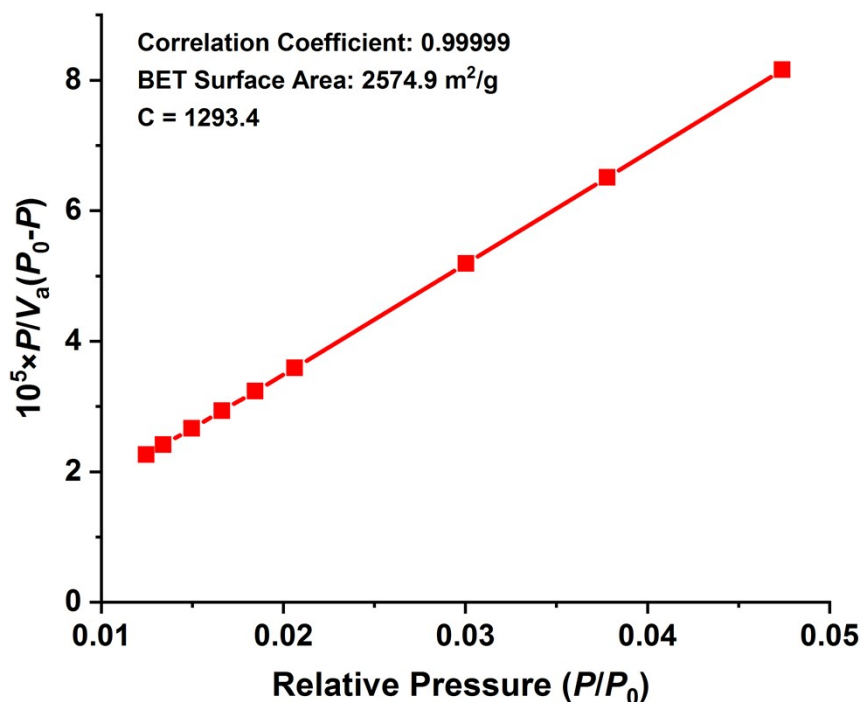

**Fig. S12** The BET plots for HNUST-17 in the chosen range ( $P/P_0 = 0.01-0.05$ ). This range was chosen according to two major criteria established in literatures<sup>[S2-3]</sup>: (1) The pressure range selected should have values of  $Q(P_0 - P)$  increasing with  $P/P_0$ . (2) The y intercept of the linear region must be positive to yield a meaningful value of the C parameter, which should be greater than zero.

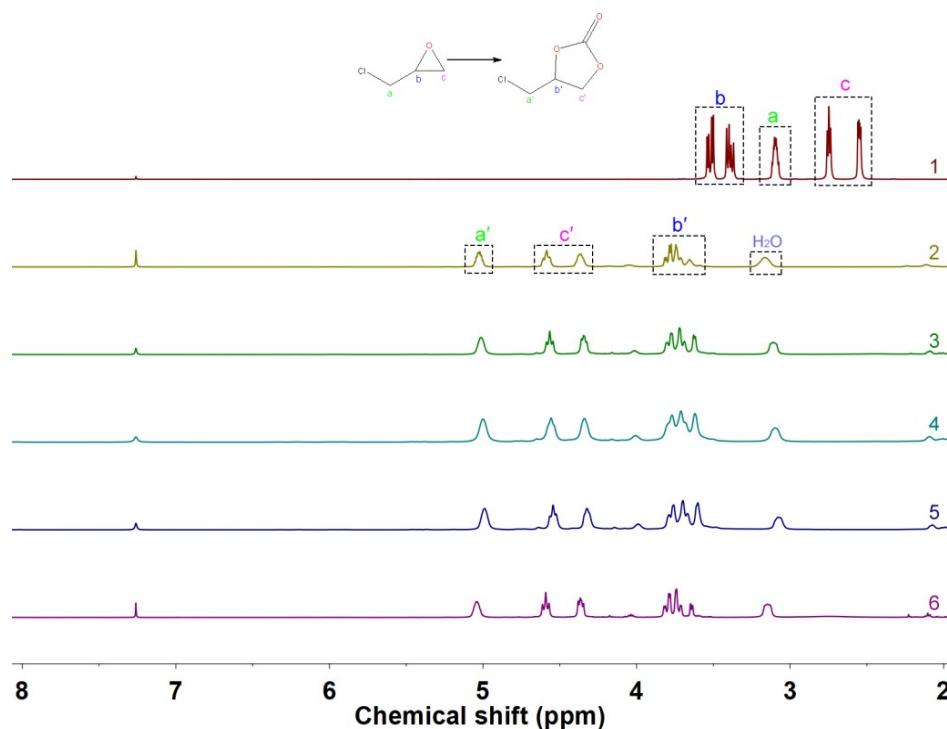

**Fig. S13** The <sup>1</sup>H NMR spectrum (in CDCl<sub>3</sub>) of a solution after the cycloaddition of CO<sub>2</sub> with 2-

(chloromethyl)oxirane: 1) without catalyst HNUST-17, 2) first cycle, 3) second cycle, 4) third cycle, 5) fourth cycle and 6) fifth cycle. The yields of the reaction have been calculated by integration of cyclic carbonates protons at the end of the reaction, due to the distinct chemical shifts for the corresponding epoxide protons.

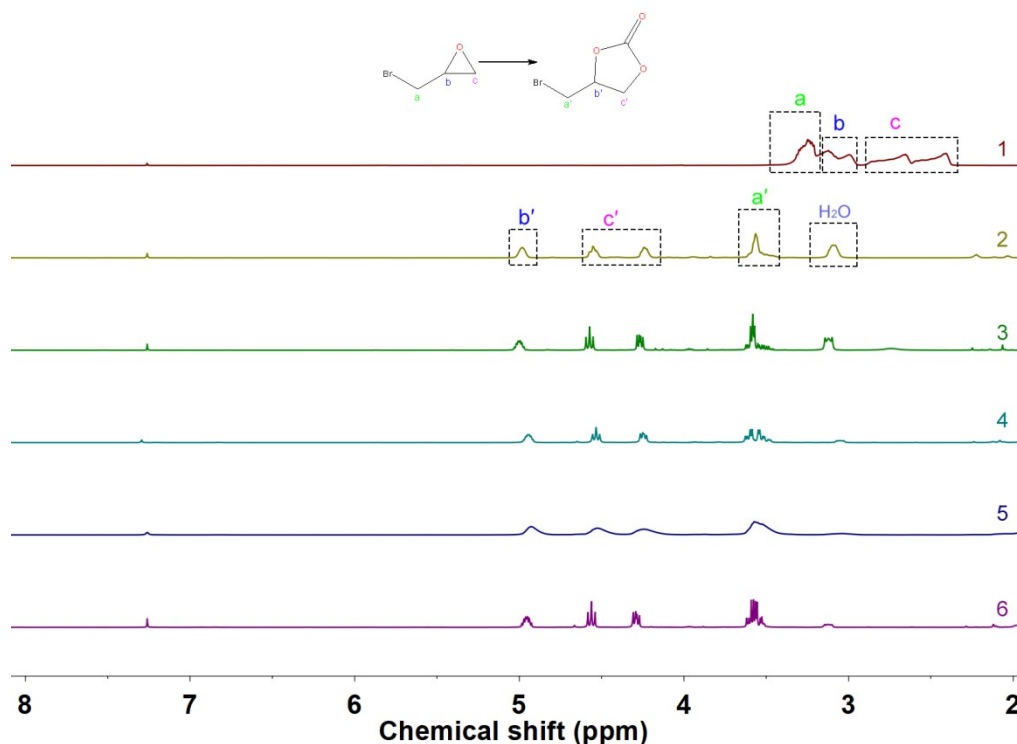

**Fig. S14** The  $^1\text{H}$  NMR spectrum (in  $\text{CDCl}_3$ ) of a solution after the cycloaddition of  $\text{CO}_2$  with 2-(bromomethyl)oxirane: 1) without catalyst HNUST-17, 2) first cycle, 3) second cycle, 4) third cycle, 5) fourth cycle and 6) fifth cycle.

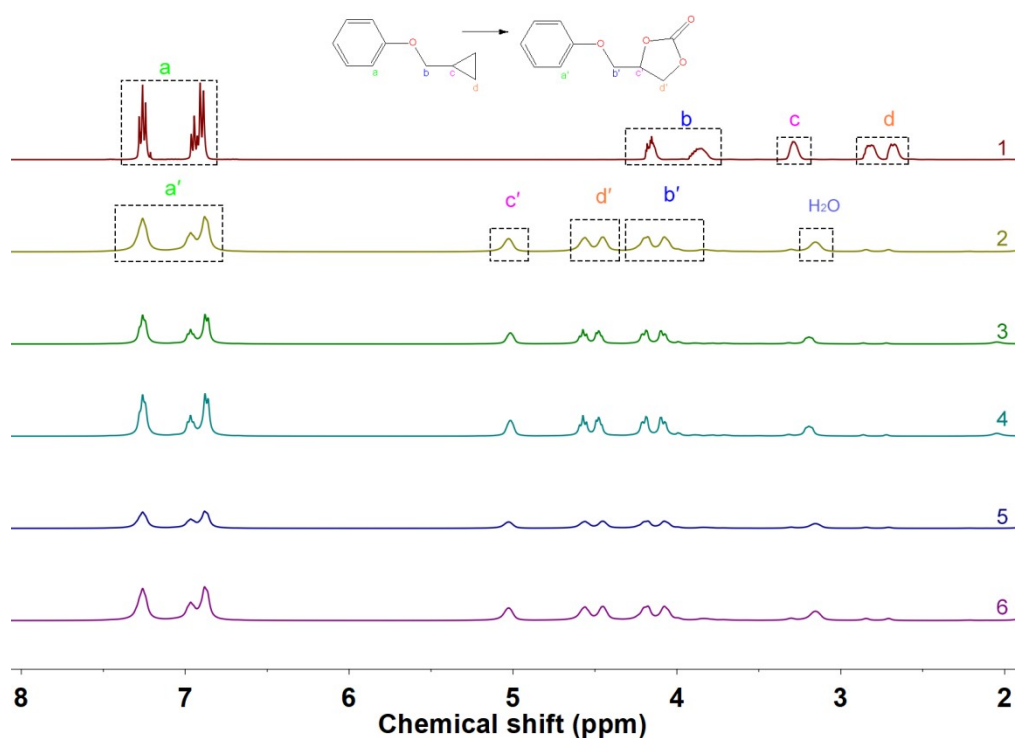

**Fig. S15** The  $^1\text{H}$  NMR spectrum (in  $\text{CDCl}_3$ ) of a mixture after the cycloaddition of  $\text{CO}_2$  with 2-(phenoxymethyl)oxirane: 1) without catalyst HNUST-17, 2) first cycle, 3) second cycle, 4) third cycle, 5) fourth cycle and 6) fifth cycle.

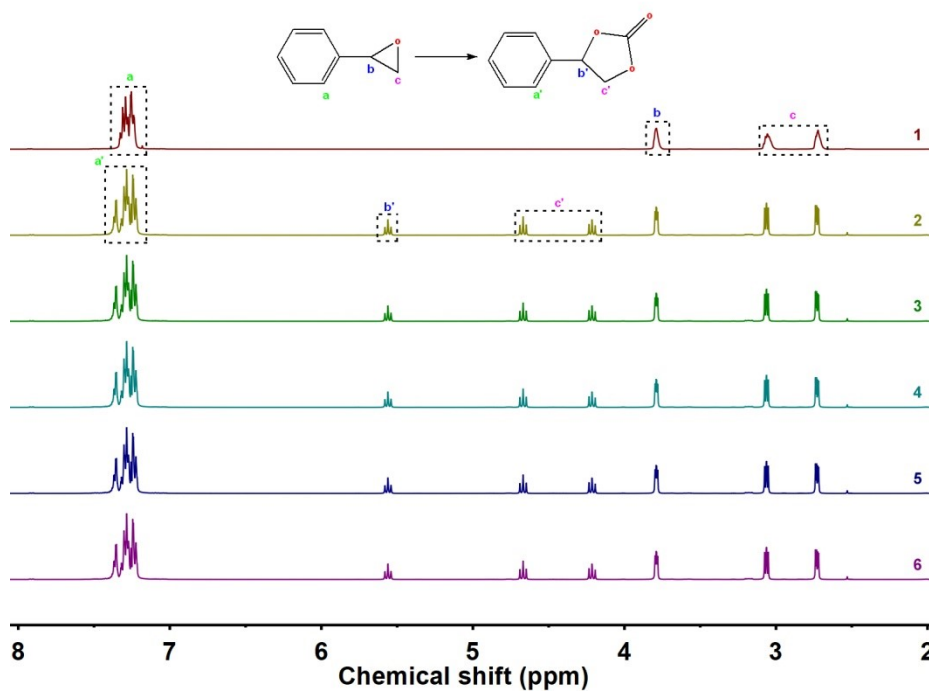

**Fig. S16** The  $^1\text{H}$  NMR spectrum (in  $\text{CDCl}_3$ ) of a solution after the cycloaddition of  $\text{CO}_2$  with 2-phenyloxirane: 1) without catalyst HNUST-17, 2) first cycle, 3) second cycle, 4) third cycle, 5) fourth cycle and 6) fifth cycle.

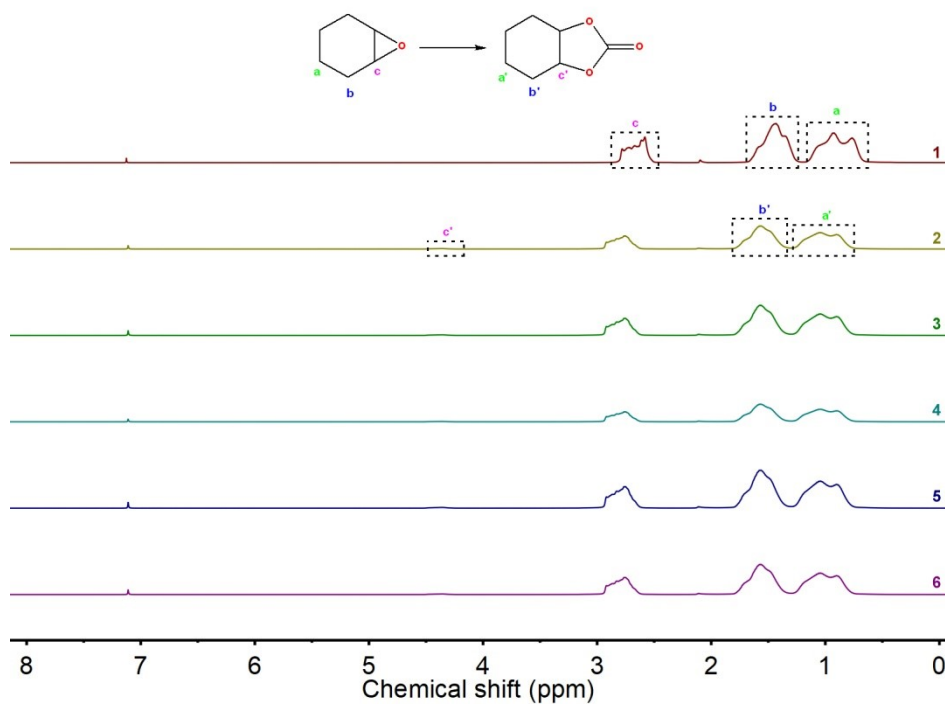

**Fig. S17** The  $^1\text{H}$  NMR spectrum (in  $\text{CDCl}_3$ ) of a solution after the cycloaddition of  $\text{CO}_2$  with cyclohexene oxide: 1) without catalyst HNUST-17, 2) first cycle, 3) second cycle, 4) third cycle, 5) fourth cycle and 6) fifth cycle.

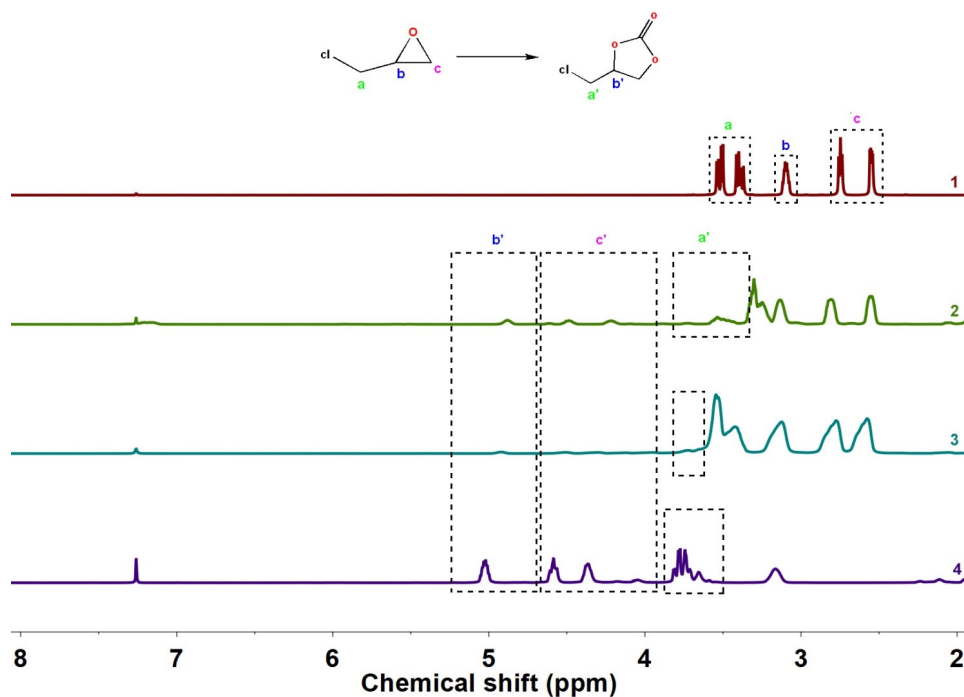

**Fig. S18** The <sup>1</sup>H NMR spectrum (in CDCl<sub>3</sub>) of a solution after the controlled experiments for cycloaddition of CO<sub>2</sub> with 2-(chloromethyl)oxirane. 1) without catalyst HNUST-17, 2) catalyzed by the cocatalyst TBAB alone, 3) catalyzed by both HNUST-17 and TBAB available at the same conditions.

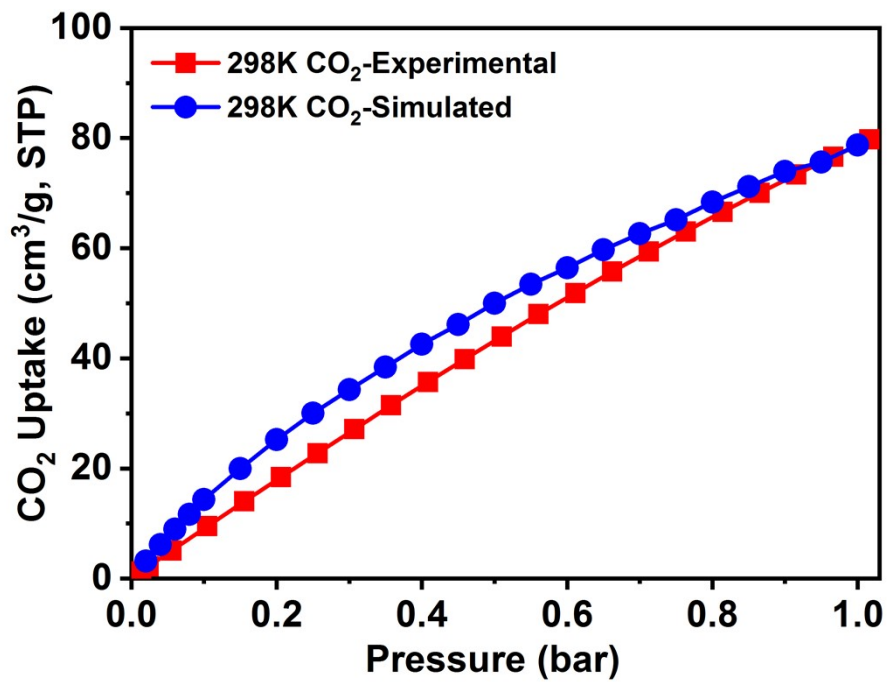

**Fig. S19** Comparison of CO<sub>2</sub> adsorption isotherms of HNUST-17 at 298 K up to 1 bar between GCMC simulated and experimental data.

**Table S1.** Crystal data and structure refinement for HNUST-17

|                     |          |
|---------------------|----------|
| Identification code | HUNST-17 |
| CCDC number         | 2348601  |



|                                   |                                                                                |
|-----------------------------------|--------------------------------------------------------------------------------|
| Empirical formula                 | C <sub>35</sub> H <sub>22</sub> Cu <sub>2</sub> N <sub>4</sub> O <sub>11</sub> |
| Formula weight                    | 801.64                                                                         |
| Temperature                       | 273 K                                                                          |
| Wavelength                        | 0.71073 Å                                                                      |
| Crystal system                    | Cubic                                                                          |
| Space group                       | Im-3m (229)                                                                    |
| Unit cell dimensions.             | $a = b = c = 36.138(9)$ Å, $\alpha = \beta = \gamma = 90^\circ$                |
| Volume                            | 47163(31) Å <sup>3</sup>                                                       |
| Z                                 | 24                                                                             |
| Density (calculated)              | 0.677 g·cm <sup>3</sup>                                                        |
| Absorption coefficient            | 0.813 mm <sup>-1</sup>                                                         |
| F(000)                            | 9720.0                                                                         |
| Crystal size                      | 0.18 × 0.2 × 0.14 mm <sup>3</sup>                                              |
| 2theta range for data collection  | 4.218 to 50.746                                                                |
| Limiting indices                  | -43 ≤ h ≤ 41, -43 ≤ k ≤ 43, -41 ≤ l ≤ 43                                       |
| Reflections collected / unique    | 154811/2940 [R <sub>int</sub> = 0.1442]                                        |
| Completeness                      | 99.5% (2theta = 52.00°)                                                        |
| Absorption correction             | Semi-empirical from equivalents                                                |
| Refinement method                 | Full-matrix least-squares on F <sup>2</sup>                                    |
| Data / restraints / parameters    | 4072/188/207                                                                   |
| Goodness-of-fit on F <sup>2</sup> | 1.925                                                                          |
| Final R indices [I > 2σ(I)]       | R <sub>1</sub> = 0.1271, wR <sub>2</sub> <sup>a</sup> = 0.3742                 |
| R indices (all data)              | R <sub>1</sub> = 0.1577, wR <sub>2</sub> <sup>a</sup> = 0.4283                 |
| Largest diff. peak and hole       | 2.04/-1.45 e. Å <sup>-3</sup>                                                  |

$$^a R_1 = \frac{\sum ||F_o| - |F_c||}{\sum |F_o|}; wR_2 = \frac{[\sum w(\sum F_o^2 - F_c^2)^2 / \sum w(F_o^2)^2]^{1/2}}{\sum w(F_o^2)^2}^{1/2}$$

**Table S2.** Lennard-Jones parameters of HNUST-17

| Atom Type | $\epsilon/k_B$ (K) | $\sigma$ (Å) | Atom Type | $\epsilon/k_B$ (K) | $\sigma$ (Å) |
|-----------|--------------------|--------------|-----------|--------------------|--------------|
| H         | 22.141             | 2.571        | C         | 52.836             | 3.431        |
| O         | 30.192             | 3.118        | N         | 34.721             | 3.261        |



|    |       |       |  |  |  |
|----|-------|-------|--|--|--|
| Cu | 2.516 | 3.114 |  |  |  |
|----|-------|-------|--|--|--|

**Table S3.** Lennard-Jones parameters and charges of adsorbates

| Atom Type | $\epsilon/k_B$ (K) | $\sigma$ (Å) | $q$ (e) |
|-----------|--------------------|--------------|---------|
| CO2_O     | 85.671             | 3.017        | -0.3256 |
| CO2_C     | 29.933             | 2.745        | 0.6512  |

**Table S4.** Comparison of catalytic activity of HNUST-17 for cycloaddition of CO<sub>2</sub> and 2-(chloromethyl)oxirane with those of some literature-reported MOF catalysts

| Entry | Catalyst | Catalytic conditions | Conversion | TON <sup>a</sup> | Ref |
|-------|----------|----------------------|------------|------------------|-----|
|-------|----------|----------------------|------------|------------------|-----|

|   |                                                                                                                    |                                                                                                                                                  | (%)   |                 |           |
|---|--------------------------------------------------------------------------------------------------------------------|--------------------------------------------------------------------------------------------------------------------------------------------------|-------|-----------------|-----------|
| 1 | HNUST-17                                                                                                           | substrate (20 mmol), catalyst (9 mg), TBAB (1% mmol based on epoxides), 1 bar CO <sub>2</sub> (balloon pressure), 80 °C and 24 h.                | >98.5 | 1755            | This work |
| 2 | [Cu <sub>6</sub> (TABAB) <sub>4</sub> (DABCO) <sub>3</sub> ] <sub>n</sub>                                          | substrate (20 mmol), catalyst (0.02 mmol), 8 bar CO <sub>2</sub> , 80 °C and 24 h.                                                               | 93    | NA <sup>b</sup> | S4        |
| 3 | HNUST-9                                                                                                            | substrate (20 mmol), catalyst (9 mg), TBAB (1% mmol based on epoxides), CO <sub>2</sub> (balloon pressure), 80 °C and 48 h.                      | >99.9 | 1332            | S5        |
| 4 | [Co <sub>2</sub> (tzpa)(OH)] <sub>n</sub>                                                                          | substrate (20 mmol), catalyst (0.2 mmol), TBAB (2 mmol), 1 bar CO <sub>2</sub> , 25 °C, 48 h.                                                    | 93.8  | NA              | S6        |
| 5 | [Cu <sub>4</sub> (C <sub>57</sub> H <sub>32</sub> N <sub>12</sub> )(C <sub>2</sub> OO) <sub>8</sub> ] <sub>n</sub> | substrate (20 mmol), catalyst (0.2 mmol %), TBAB (10 mol %), 1 bar CO <sub>2</sub> , 25 °C, 48 h.                                                | 85    | 177             | S7        |
| 6 | [Sr(BDPO) <sub>0.5</sub> ] <sub>n</sub>                                                                            | substrate (28.6 mmol), catalyst (0.84 % mmol), TBAB (3.5% mmol), 1 bar CO <sub>2</sub> , 25 °C and 48 h.                                         | 98.5  | 117.4           | S8        |
| 7 | [(C <sub>2</sub> NH <sub>8</sub> ) <sub>6</sub> (Cd <sub>3</sub> L)] <sub>n</sub>                                  | substrate (5 mmol), catalyst (5 mg, 0.002 mmol based on Lewis acid sites), TBAB (0.16 g, 0.5 mmol), 1 bar CO <sub>2</sub> , 80 °C and 24 h.      | 99    | 2745            | S9        |
| 8 | JUC-1000                                                                                                           | substrate (20.0 mmol), catalyst (0.25 mol% per exposed copper site), TBABr (0.65 g), at room temperature 1 bar CO <sub>2</sub> , 25 °C and 48 h. | 96    | NA              | S10       |

<sup>a</sup> Turnover number (TON) = [mmol (product)]/[mmol (Lewis acid sites)]. <sup>b</sup> NA = Not available.

**Table S5.** Comparison of the CO<sub>2</sub> sorption properties of HNUST-17 with those of some literature-reported MOFs with various surface areas

| Entry | MOF                                                                                                                                     | BET<br>(m <sup>2</sup> /g) | CO <sub>2</sub> uptake capacities                                                                                                                       | Q <sub>st</sub><br>(kJ/mol ) | Selectivity<br>(CO <sub>2</sub> /N <sub>2</sub> , CO <sub>2</sub> /CH <sub>4</sub> )              | Ref       |
|-------|-----------------------------------------------------------------------------------------------------------------------------------------|----------------------------|---------------------------------------------------------------------------------------------------------------------------------------------------------|------------------------------|---------------------------------------------------------------------------------------------------|-----------|
| 1     | HNUST-17                                                                                                                                | 2575                       | 145.41 and 79.75 cm <sup>3</sup> ·g <sup>-1</sup> at 273 K and 298 K under 1 bar; 24.49 and 18.80 mmol·g <sup>-1</sup> under 30 bar at 273 K and 298 K. | 25.4                         | 207 and 8.0 for CO <sub>2</sub> /N <sub>2</sub> and CO <sub>2</sub> /CH <sub>4</sub> at 273 K.    | This work |
| 2     | HNUST-7                                                                                                                                 | 2804                       | 121.44 and 68.05 cm <sup>3</sup> ·g <sup>-1</sup> at 273 and 298 K under 1 bar; 26.1 and 19.4 mmol·g <sup>-1</sup> under 30 bar at 273 and 298 K.       | 24.8                         | 22.39 and 6.92 for CO <sub>2</sub> /N <sub>2</sub> and CO <sub>2</sub> /CH <sub>4</sub> at 273 K. | S11       |
| 3     | HNUST-8                                                                                                                                 | 2801                       | 144.76 and 78.36 cm <sup>3</sup> ·g <sup>-1</sup> at 273 and 298 K under 1 bar; 22.42 and 19.5 mmol·g <sup>-1</sup> under 30 bar at 273 and 298 K.      | 24.9                         | 16.2 and 5.0 for CO <sub>2</sub> /N <sub>2</sub> and CO <sub>2</sub> /CH <sub>4</sub> at 298 K.   | S12       |
| 4     | HNUST-2                                                                                                                                 | 2366                       | 21.6 and 18.1 mmol·g <sup>-1</sup> under 20 bar at 273 and 298 K.                                                                                       | 23.5                         | 22.9 and 4.9 for CO <sub>2</sub> /N <sub>2</sub> and CO <sub>2</sub> /CH <sub>4</sub> at 298 K.   | S13       |
| 5     | HHU-1                                                                                                                                   | 2290                       | 114.6 and 66.8 cm <sup>3</sup> ·g <sup>-1</sup> at 273 K and 298 K under 1 bar; 21.53 mmol·g <sup>-1</sup> under 40 bar at 298 K.                       | 27.7                         | 140 for CO <sub>2</sub> /N <sub>2</sub> at 273 K.                                                 | S14       |
| 6     | NJU-Bai22                                                                                                                               | 2221                       | 72.9 cm <sup>3</sup> ·g <sup>-1</sup> at 298 K under 1 bar; 21.3 mmol·g <sup>-1</sup> under 40 bar at 298 K.                                            | 25.6                         | 81 and 6.7 for CO <sub>2</sub> /N <sub>2</sub> and CO <sub>2</sub> /CH <sub>4</sub> at 298 K.     | S15       |
| 7     | NTU-105                                                                                                                                 | 3543                       | 168.3 cm <sup>3</sup> ·g <sup>-1</sup> (36.7 wt%) at 273 K and 1 bar.                                                                                   | NA <sup>a</sup>              | NA                                                                                                | S16       |
| 8     | (In <sub>2</sub> X)(Me <sub>2</sub> NH <sub>2</sub> ) <sub>2</sub> ,<br>H <sub>8</sub> X=tetrakis [(3,5-dicarboxyphenoxy)methyl]methane | 1555                       | 99.7 and 56.2 cm <sup>3</sup> ·g <sup>-1</sup> at 273 K and 298 K under 1 bar.                                                                          | 21.14                        | 250 for CO <sub>2</sub> /N <sub>2</sub> at 273 K.                                                 | S17       |

|    |                          |      |                                                                                  |      |                                                                   |            |
|----|--------------------------|------|----------------------------------------------------------------------------------|------|-------------------------------------------------------------------|------------|
| 9  | CPM-33a                  | 996  | 137.2 and 73.6 cm <sup>3</sup> ·g <sup>-1</sup> at 273 K and 298 K under 1 bar.  | 22.5 | NA                                                                | S18        |
| 10 | CPM-33b                  | 808  | 173.9 and 126.4 cm <sup>3</sup> ·g <sup>-1</sup> at 273 K and 298 K under 1 bar. | 25.0 | NA                                                                | S18        |
| 11 | CPM-33c                  | 805  | 134.2 and 88.5 cm <sup>3</sup> ·g <sup>-1</sup> at 273 K and 298 K under 1 bar.  | 21.5 | NA                                                                | S18        |
| 12 | Bio-MOF-11               | 1040 | 91.1 cm <sup>3</sup> ·g <sup>-1</sup> at 298 K under 1 bar.                      | 45.0 | 81 and 75 for CO <sub>2</sub> /N <sub>2</sub> at 273 K and 298 K. | S19        |
| 13 | CuBTTri                  | 1770 | 85.0 cm <sup>3</sup> ·g <sup>-1</sup> at 298 K under 1 bar.                      | 90.0 | NA                                                                | S20        |
| 14 | [Ba <sub>2</sub> (BDPO)] | 487  | 75.85 and 52.92 cm <sup>3</sup> ·g <sup>-1</sup> at 273 K and 298 K under 1 bar. | 32.7 | 12.3 for CO <sub>2</sub> /CH <sub>4</sub> at 298 K.               | S21        |
| 15 | MIL-100                  | 1900 | 18 mmol·g <sup>-1</sup> at 303 K under 48.7 bar.                                 | 62   | NA                                                                | S22        |
| 16 | RMOF-11                  | 2096 | 14.7 mmol·g <sup>-1</sup> at 298 K under 35 bar.                                 | NA   | NA                                                                | S23        |
| 17 | IRMOF-3                  | 2160 | 18.7 mmol·g <sup>-1</sup> at 298 K under 35 bar.                                 | NA   | NA                                                                | S23        |
| 18 | IRMOF-6                  | 2516 | 19.5 mmol·g <sup>-1</sup> at 298 K under 35 bar.                                 | NA   | NA                                                                | S23        |
| 19 | MOF-5                    | 3800 | 21.7 mmol·g <sup>-1</sup> at 298 K under 35 bar.                                 | NA   | NA                                                                | S23        |
| 20 | HKUST-1                  | 1781 | 10.7 mmol·g <sup>-1</sup> at 298 K under 35 bar.                                 | 30   | NA                                                                | S23/<br>24 |
| 21 | MOF-177                  | 4508 | 33.5 mmol·g <sup>-1</sup> at 298 K under 35 bar.                                 | NA   | NA                                                                | S23        |
| 22 | RMOF-1                   | 2833 | 21.7 mmol·g <sup>-1</sup> at 298 K under 35 bar.                                 | NA   | NA                                                                | S23        |
| 23 | MIL-101                  | 4230 | 40.0 mmol·g <sup>-1</sup> at 303 K under 50 bar.                                 | NA   | NA                                                                | S22        |
| 24 | MOF210                   | 5850 | 54.5 mmol·g <sup>-1</sup> , at 298 K under 50 bar                                | NA   | NA                                                                | S25        |

|    |        |      |                                                   |    |    |     |
|----|--------|------|---------------------------------------------------|----|----|-----|
| 25 | MOF200 | 6400 | 54.5 mmol·g <sup>-1</sup> , at 298 K under 50 bar | NA | NA | S25 |
|----|--------|------|---------------------------------------------------|----|----|-----|

<sup>a</sup> NA = Not available.

## References

S1. Y. Bae, K. L. Mulfort, H. Frost, P. Ryan, S. Punathanam, L. J. Broadbelt, J. T. Hupp and R. Q. Snurr, Separation of CO<sub>2</sub> from CH<sub>4</sub> using mixed-ligand metal-organic frameworks, *Langmuir*, 2008, 24, 8592-8598.

S2. J. Rouquerol, P. Llewellyn and F. Rouquerol, Is the bet equation applicable to microporous adsorbents? *Stud. Surf. Sci. Catal.*, 2007, 160, 49-56.

S3. K. S. Walton and R. Q. Snurr, Applicability of the BET method for determining surface areas of microporous metal-organic frameworks, *J. Am. Chem. Soc.*, 2007, 129, 8552-8556.

S4. Sandeep Singh Dhankhar, Rajesh Das, Bharat Ugale, Renjith S. Pillai, and C. M. Nagaraja, Chemical fixation of CO<sub>2</sub> under solvent and Co-catalyst-free conditions using a highly porous two-fold interpenetrated Cu(II)-metal-organic framework, *Cryst. Growth Des.*, 2021, 21, 1233-1241.

S5. J. X. Liao, W. J. Zeng, B. S. Zheng, X. Y. Cao, Z. X. Wang, G. Y. Wang and Q. Y. Yang, Highly efficient CO<sub>2</sub> capture and conversion of a microporous acylamide functionalized rht-type metal-organic framework, *Inorg. Chem. Front.*, 2020, 7, 1939-1948.

S6. H.-H. Wang, L. Hou, Y.-Z. Li, C.-Y. Jiang, Y.-Y. Wang and Z. H. Zhu, Porous MOF with highly efficient selectivity and chemical conversion for CO<sub>2</sub>, *ACS Appl. Mater. Interfaces*, 2017, 9, 17969-17976.

S7. P.-Z. Li, X.-J. Wang, J. Liu, J. S. Lim, R. Zou and Y. Zhao, A Triazole-containing metal-organic framework as a highly effective and substrate size-dependent catalyst for CO<sub>2</sub> conversion, *J. Am. Chem. Soc.*, 2016, 138, 2142-2145.

S8. X.-Y. Li, Y.-Z. Li, Y. Yang, L. Hou, Y.-Y. Wang and Z. H. Zhu, Efficient light hydrocarbon separation and CO<sub>2</sub> capture and conversion in a stable MOF with oxalamide-decorated polar tubes, *Chem. Commun.*, 2017, 10, 12970-12973.

S9. B.-B. Lu, W. Jiang, J. Yang, Y.-Y. Liu and J.-F. Ma, Resorcin[4]arene-based microporous metal-organic framework as an efficient catalyst for CO<sub>2</sub> cycloaddition with epoxides and highly selective luminescent sensing of Cr<sub>2</sub>O<sub>7</sub><sup>2-</sup>, *ACS Appl. Mater. Interfaces*, 2017, 9, 39441-39449.

S10. H. M. He, Q. Sun, W. Y. Gao, J. A. Perman, F. X. Sun, G. S. Zhu, B. Aguila, K. Forrest, B. Space and S. Q. Ma, A stable metal-organic framework featuring a local buffer environment for carbon dioxide fixation, *Angew. Chem. Int. Ed.*, 2018, 57, 4657-4662.

S11. B. S. Zheng, L. Huang, X. Y. Cao, S. H. Shen, H. F. Cao, C. Hang, W. J. Zeng and Z. X. Wang, A highly porous acylamide decorated MOF-505 analogue exhibiting high and selective CO<sub>2</sub> gas uptake capability, *CrystEngComm.*, 2018, 20, 1874-1881.

S12. B. Zheng, X. Luo, Z. Wang, S. Zhang, R. Yun, L. Huang, W. Zeng and W. Liu, An unprecedented water stable acylamide-functionalized metal-organic framework for highly efficient CH<sub>4</sub>/CO<sub>2</sub> gas storage/separation and acid-base cooperative catalytic activity, *Inorg. Chem. Front.*, 2018, 5, 2355-2363.

S13. Z. X. Wang, B. S. Zheng, H. T. Liu, P. G. Yi, X. F. Li, X. Y. Yu and R. R. Yun, A highly porous 4,4-paddlewheel-connected NbO-type metal-organic framework with a large gas-uptake capacity, *Dalton Trans.*, 2013, 42, 11304-11311.

S14. Z. Y. Lu, J. F. Zhang, H. Y. He, L. T. Du and C. Hang, A mesoporous (3, 36)-connected ttt-type metal-organic framework constructed by using a naphthyl-embedded ligand exhibiting high CO<sub>2</sub> storage and selectivity, *Inorg. Chem. Front.*, 2017, 4, 736-740.

S15. Z. Y. Lu, J. F. Bai, C. Hang, F. Meng, W. L. Liu, Y. Pan and X. Z. You, The utilization of amide groups to expand and functionalize metal-organic frameworks simultaneously, *Chem-Eur. J.*, 2016, 22, 6277-6285.

S16. X.-J. Wang, P.-Z. Li, Y. F. Chen, Q. Zhang, H. C. Zhang, X. X. Chan, R. Ganguly, Y. X. Li, J. W. Jiang, Y. L. Zhao, A rationally designed nitrogen-rich metal-organic framework and its exceptionally high CO<sub>2</sub> and H<sub>2</sub> uptake capability, *Sci. Rep.*, 2013, 3, 1149.

S17. Z.-J. Lin, Y.-B. Huang, T.-F. Liu, X.-Y. Li and R. Cao, Construction of a polyhedral metal-organic framework via a flexible octacarboxylate ligand for gas adsorption and separation, *Inorg. Chem.*, 2013, 52, 3127-3132.

S18. X. Zhao, X. H. Bu, Q.-G. Zhai, H. Tran and P. Y. Feng, Pore space partition by symmetry-matching regulated ligand insertion and dramatic tuning on carbon dioxide uptake, *J. Am. Chem. Soc.*, 2015, 137, 1396-1399.

S19. J. An, S. J. Geib, N. Rosi, High and selective CO<sub>2</sub> uptake in a cobalt adeninate metal-organic framework exhibiting pyrimidine- and amino-decorated pores, *J. Am. Chem. Soc.*, 2010, 132, 38-39.

S20. A. Demessence, D. M. D'Alessandro, M. L. Foo, J. R. Long, Strong CO<sub>2</sub> binding in a water-stable, triazolate-bridged metal-organic framework functionalized with ethylenediamine, *J. Am. Chem. Soc.*, 2009, 131, 8784-8786.

S21. X.-Y. Li, L.-N. Ma, Y. Liu, L. Hou, Y.-Y. Wang, Z. H. Zhu, Honeycomb metal-organic framework with Lewis acidic and basic bifunctional sites: selective adsorption and CO<sub>2</sub> catalytic fixation, *ACS Appl. Mater. Interfaces*, 2018, 10, 13, 10965-10973.

S22. P. L. Llewellyn, S. Bourrelly, C. Serre, A. Vimont, M. Daturi, L. Hamon, G. De Weireld, J.-S. Chang, D.-Y. Hong, Y.K. Hwang, S.H. Jung, G. Férey, High Uptakes of CO<sub>2</sub> and CH<sub>4</sub> in Mesoporous Metal-organic frameworks MIL-100 and MIL-101, *Langmuir*, 2008, 24, 7245-7250.

S23. A. R. Millward, O. M. Yaghi, Metal-organic frameworks with exceptionally high capacity for storage of carbon dioxide at room temperature, *J. Am. Chem. Soc.*, 2005, 127, 17998-17999.

S24. Z.J. Liang, M. Marshall, A.L. Chaffee, CO<sub>2</sub> adsorption-based separation by metal organic framework (Cu-BTC) versus Zeolite (13X), *Energy Fuels*, 2009, 23, 2785-2789.

S25. H. Furukawa, N. Ko, Y. Bok Go, N. Aratani, S. B. Choi, E. Choi, A. Ö. Yazaydin, R. Q. Snurr, M. O’Keeffe, J. Kim, O. M. Yaghi, Ultrahigh porosity in metal-organic frameworks, *Science*, 2010, 329, 424.
